# Supplementary material for: Anticancer evaluation of new organometallic ruthenium(ii) flavone complexes
Source: Royal Society of Chemistry journal article supplement (doi:10.1039/d2md00304j), 2022-12-15
Supplement: d2md00304j1.pdf [file d2md00304j1.pdf]

## Anticancer evaluation of new organometallic ruthenium(II) flavone complexes

Supporting information

### 1. Synthesis:

#### 1.1. Structural characterization of compounds 1 and 2 as previously reported

##### **2-(4-Chlorophenyl)-5,7-dihydroxy-4H-chromen-4-one (1)**

**Yield:** 97%; **mp:** 250 °C (lit.<sup>[1]</sup> 294-296 °C); **IR**  $\nu_{\max}/\text{cm}^{-1}$ : 3350 (OH, w, b), 1680 (C=O, v, m), 1091 (C-O, v, s); **<sup>1</sup>H NMR:** (400 MHz, DMSO-d<sub>6</sub>, Me<sub>4</sub>Si)  $\delta$  6.29 (1H, s, H-6), 6.59 (1H, s, H-8), 7.08 (1H, s, H-3), 7.62 (2H, d,  $J$  = 8.8 Hz, H-2',6'), 7.99 (2H, d,  $J$  = 8.8 Hz, H-3',5'), 12.20 (1H, s, OH), 12.84 (1H, s, OH); **<sup>13</sup>C NMR:** (100 MHz, DMSO-d<sub>6</sub>, Me<sub>4</sub>Si)  $\delta$  93.98 (C8), 99.04 (C6), 105.51 (C3, C10), 128.22 (C1'), 128.70 (C3', C5'), 129.18 (C2', C6'), 131.93 (C4'), 157.36 (C9), 161.39 (C5), 161.94 (C2), 166.41 (C7), 181.83 (C=O);  **$m/z$  (FTMS+ESI):** M+H (C<sub>15</sub>H<sub>10</sub>O<sub>4</sub><sup>35</sup>Cl) requires 289.0262, found 289.0260. HPLC Purity: 99.4%

##### **2-(4-Chlorophenyl)-5,7-dihydroxy-4H-chromene-4-thione (2)**

**Yield:** 64%; **mp:** 247.7-248 °C (lit.<sup>[1]</sup> 249-252 °C); **IR**  $\nu_{\max}/\text{cm}^{-1}$ : 3358 (OH, w, b), 1170 (C=S, v, m), 1135 (c-O, v, m); **<sup>1</sup>H NMR:** (400 MHz, DMSO-d<sub>6</sub>, Me<sub>4</sub>Si)  $\delta$  6.28 (1H, s, H-6), 6.55 (1H, s, H-8), 7.55 (1H, s, H-3), 7.58 (2H, d,  $J$  = 8.4 Hz, H-2',6'), 8.11 (2H, d,  $J$  = 8.4 Hz, H-3',5'), 11.24 (1H, s, OH), 13.54 (1H, s, OH); **<sup>13</sup>C NMR:** (100 MHz, DMSO-d<sub>6</sub>, Me<sub>4</sub>Si)  $\delta$  95.28 (C8), 101.30 (C6), 113.13 (C10), 118.00 (C3), 129.84 (C1', 3', 5'), 129.84 (C2', C6'), 137.63 (C4'), 153.62 (C2), 154.55 (C9), 162.32 (C7), 165.19 (C5), 196.52 (C=S);  **$m/z$  (FTMS+ESI):** M+H (C<sub>15</sub>H<sub>10</sub>O<sub>3</sub><sup>35</sup>ClS) requires 305.0034, found 305.0034. HPLC Purity: 98.6%

#### 1.2. NMR spectra

(A)

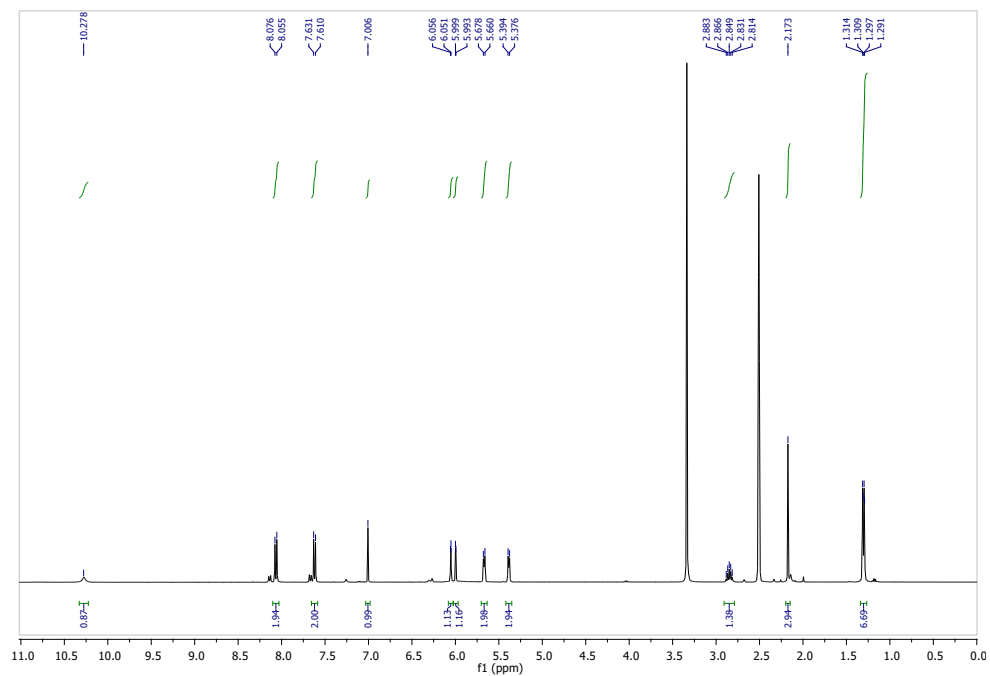

(B)

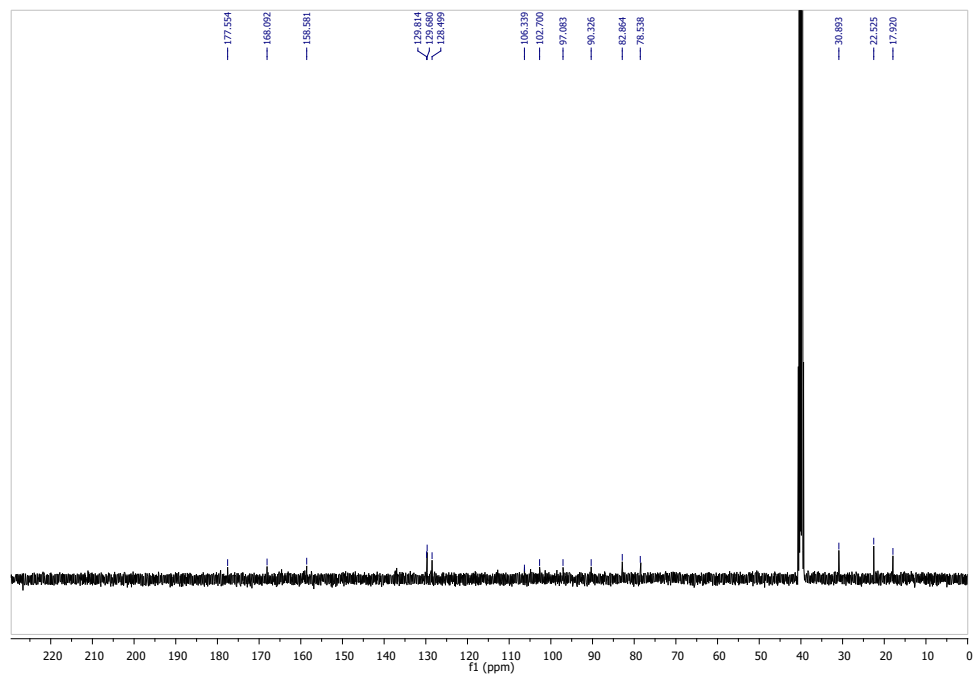

(C)

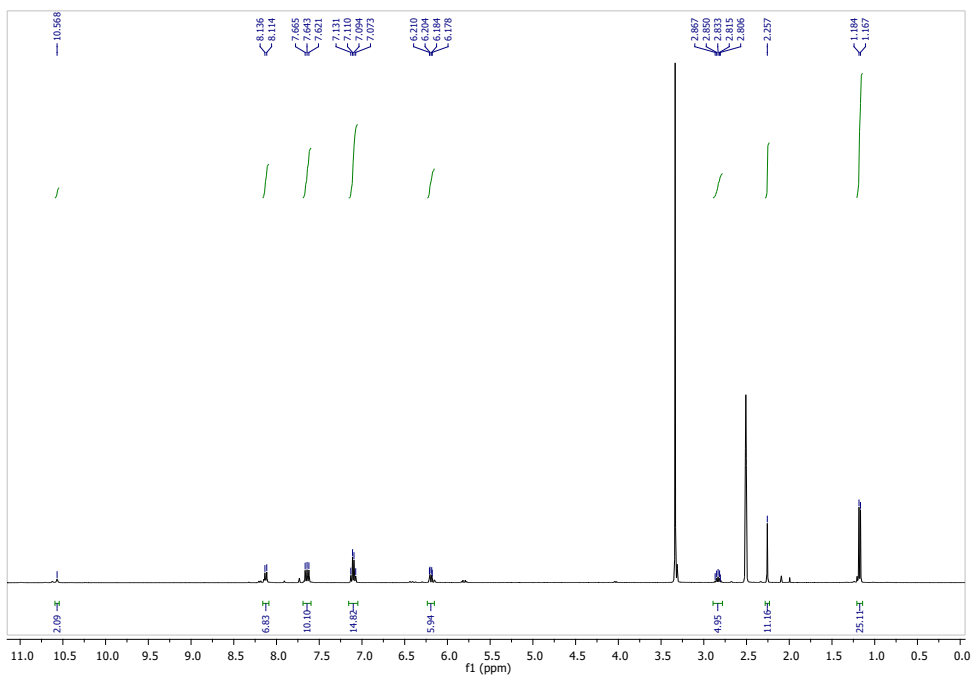

(D)

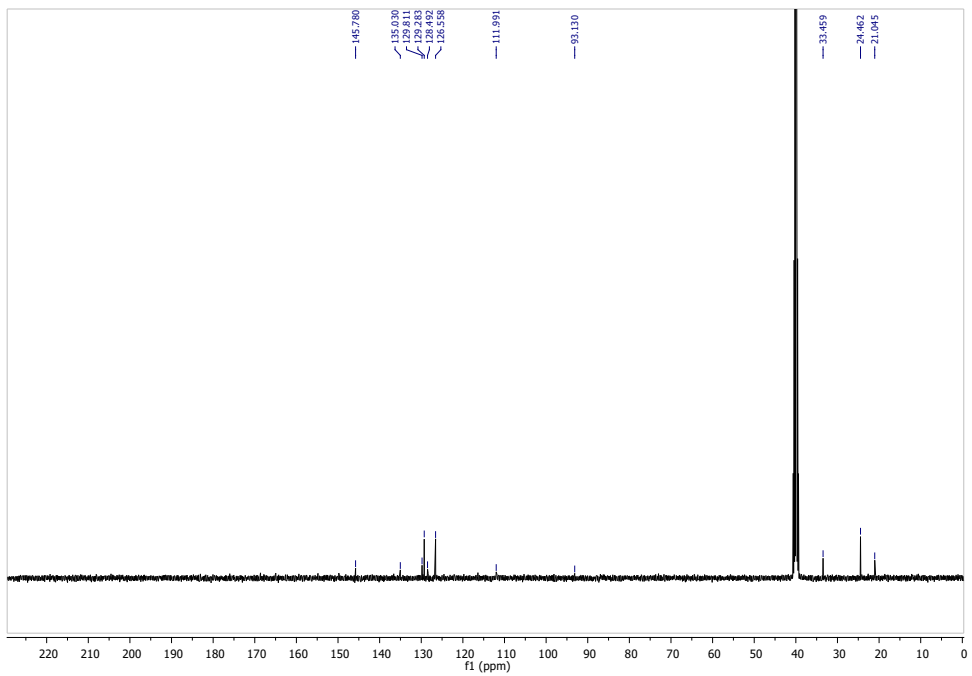

**Figure 1.**  $^1\text{H}$  NMR spectra of Ru complexes (1Ru and 2Ru). (A) 1Ru  $^1\text{H}$  NMR; (B) 1Ru  $^{13}\text{C}$  NMR; (C) 2Ru  $^1\text{H}$  NMR; (D) 2Ru  $^{13}\text{C}$  NMR.

(A)

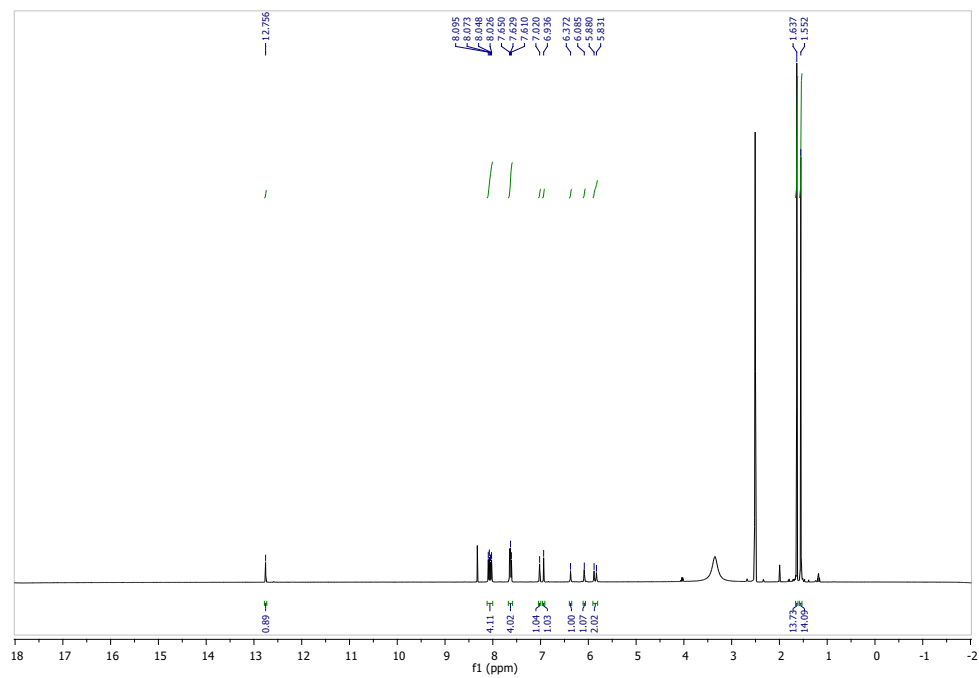

(B)

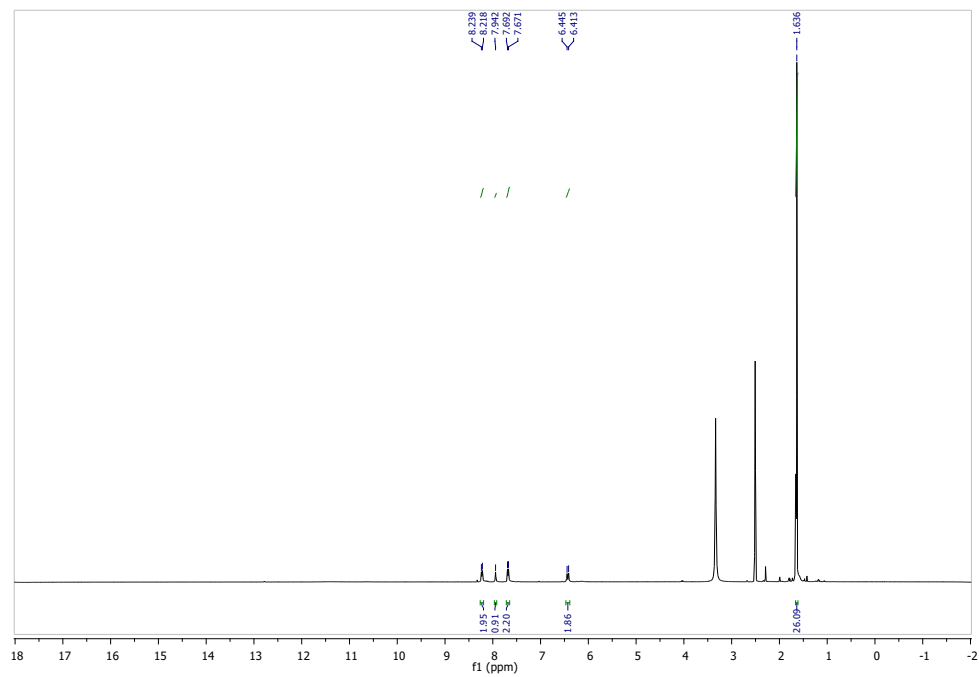

Figure 2.  $^1\text{H}$  NMR spectra of (A) 1Ir and (B) 2Ir.

## 2. UV-VIS stability profiles

(A)

(B)

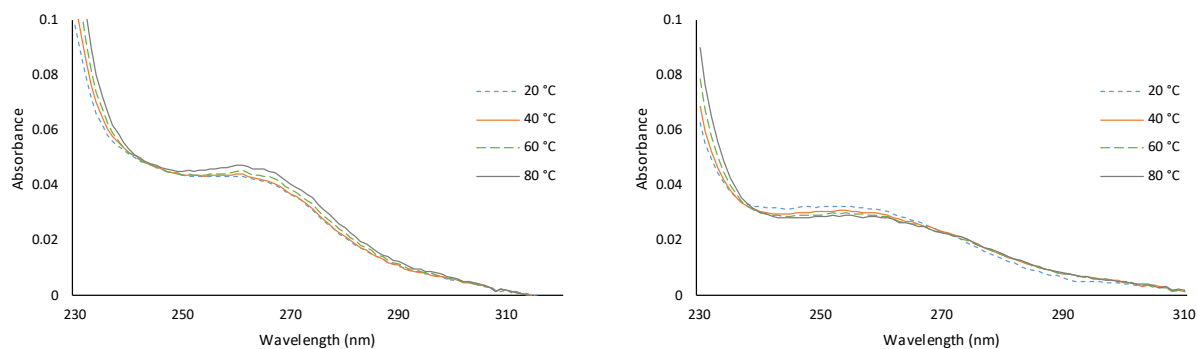

**Figure 3.** Temperature dependant UV-VIS spectra of (A) 1Ru and (B) 2Ru in 0.1%DMSO/ddH<sub>2</sub>O solution recorded over a 6 h time interval.

**Table 1.**  $\lambda_{260}^a$  and  $\Delta \lambda_{260}^b$  of complexes 1Ru and 2Ru at 20 °C – 80 °C

| <b>1Ru</b>   | <b><math>\lambda_{260}</math></b> | <b><math>\Delta \lambda_{260}</math></b> | <b>2Ru</b>   | <b><math>\lambda_{260}</math></b> | <b><math>\Delta \lambda_{260}</math></b> |
|--------------|-----------------------------------|------------------------------------------|--------------|-----------------------------------|------------------------------------------|
| <b>20 °C</b> | 0.0435                            | 0                                        | <b>20 °C</b> | 0.03108                           | 0                                        |
| <b>40 °C</b> | 0.04422                           | 0.00072                                  | <b>40 °C</b> | 0.02973                           | 0.0013                                   |
| <b>60 °C</b> | 0.04525                           | 0.00174                                  | <b>60 °C</b> | 0.02902                           | 0.0021                                   |
| <b>80 °C</b> | 0.04738                           | 0.00388                                  | <b>80 °C</b> | 0.02832                           | 0.0028                                   |

a  $\lambda_{260}$  is the absorbance at 260 nm

b  $\Delta \lambda_{260} = \lambda_{260} (40, 60 \text{ or } 80 \text{ °C}) - \lambda_{260} (20 \text{ °C})$

## References:

1. Ravishankar, D.; Watson, K. A.; Greco, F.; Osborn, H. M. I. Novel Synthesised Flavone Derivatives Provide Significant Insight into the Structural Features Required for Enhanced Anti-Proliferative Activity. *RSC Adv.* **2016**, *6* (69), 64544–64556. <https://doi.org/10.1039/c6ra11041j>.
